# Supplementary material for: Active Constituent in the Ethyl Acetate Extract Fraction of Terminalia bellirica Fruit Exhibits Antioxidation, Antifibrosis, and Proapoptosis Capabilities In Vitro
Source: Hindawi journal article supplement (doi:10.1155/2019/5176090), 2019-05-09
Supplement: f1 [file 5176090.f1.pdf]

Table S1. Primer sequences used for real time-PCR analysis

| Gene           | Direction | Sequence                  |
|----------------|-----------|---------------------------|
| GAPDH          | Forward   | GGCATCGTGGAAGGGCTCAT      |
|                | Reverse   | AGGGATGATGTTCTGGGCTGC     |
| PDGFR          | Forward   | CATTGGGGACAGGGAAGTGGAC    |
|                | Reverse   | CCTGATGGTGATGCTCTCGC      |
| CTGF           | Forward   | CTGAAAGAATAGCTGGCTTCA     |
|                | Reverse   | CAGGTACTAGCTGAGGTCAT      |
| NF- $\kappa$ B | Forward   | AACACTGCCGAGCTCAAGAT      |
|                | Reverse   | CATCGGCTTGAGAAAAGGAG      |
| MMP-2          | Forward   | CTTGCTGGTGGCCACATTC       |
|                | Reverse   | CTCATTCCCTGCGAAGAACAC     |
| TIMP-1         | Forward   | GCCTACACCCCAGCCAT         |
|                | Reverse   | ATGCCAGGGAACCAGGAAGC      |
| TIMP-2         | Forward   | GGCAACCCCATCAAGAGGATTCAAT |
|                | Reverse   | CACACTGCTGAGGAGGGG        |
| $\alpha$ -SMA  | Forward   | TTCGTGACTACTGCTGAGCGTGAGA |
|                | Reverse   | AAAGATGGCTGGAAGAGGGTC     |
| Bcl-2          | Forward   | TCCTTCCAGCCTGAGAGCAAC     |
|                | Reverse   | GCGACGGTAGCGACGAGAG       |
| Bax            | Forward   | ATGGGCTGGACACTGGACTTC     |
|                | Reverse   | GAGTGAGGCAGTGAGGAC        |

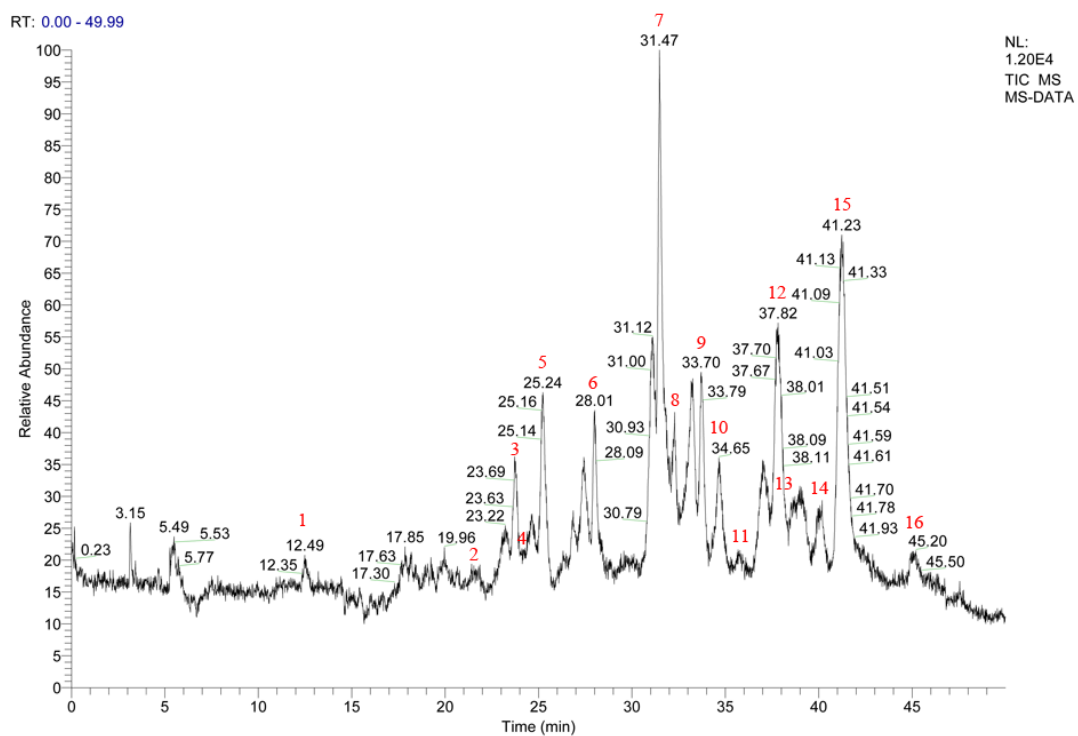

**Supplemental Figure 1.** The total ion current (TIC) output from the ESI-MS in negative mode.

1

RT: 0.00 - 49.99

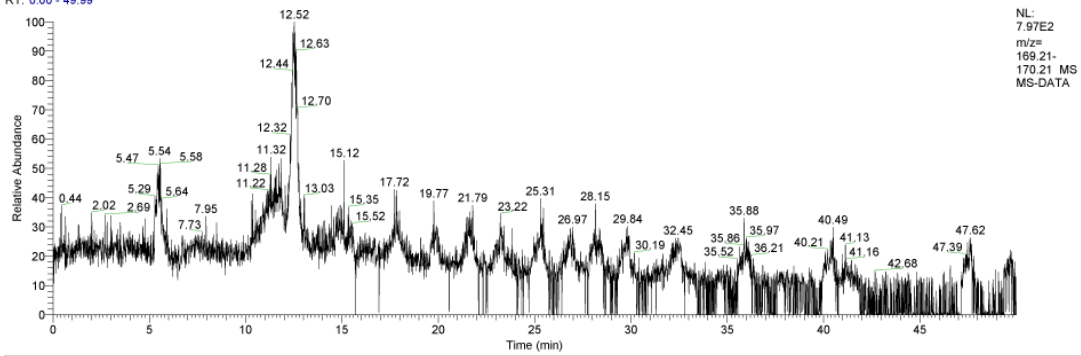MS-DATA #989 RT: 12.52 AV: 1 NL: 1.14E3  
T: ITMS - c ESI Full ms [100.00-1000.00]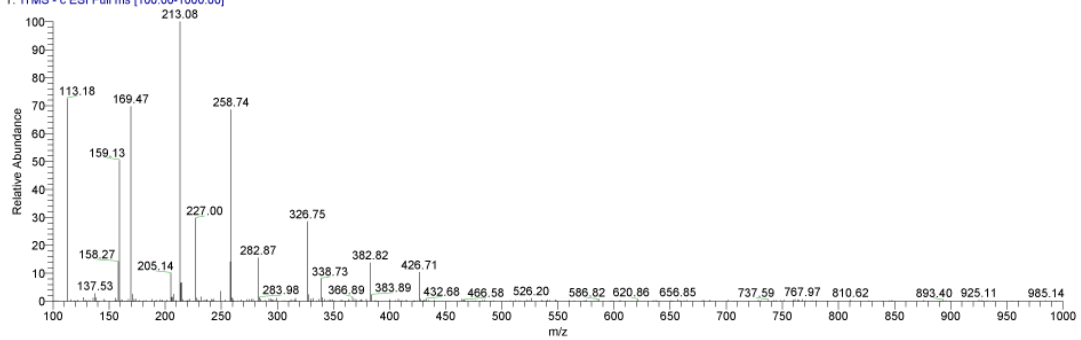

2

RT: 0.00 - 49.99

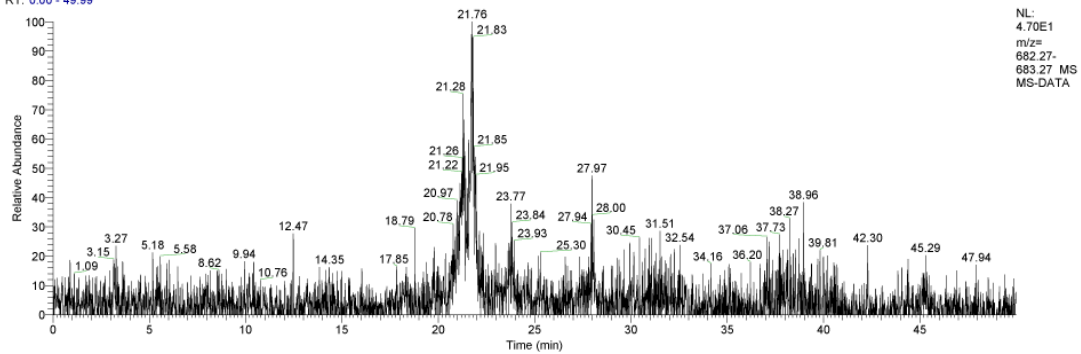MS data #1718 RT: 21.76 AV: 1 NL: 1.79E3  
T: ITMS - c ESI Full ms [100.00-1000.00]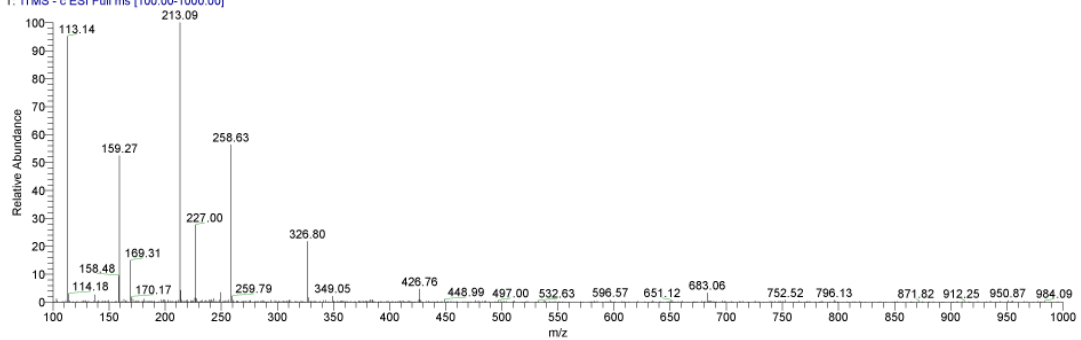

3

RT: 0.00 - 49.99

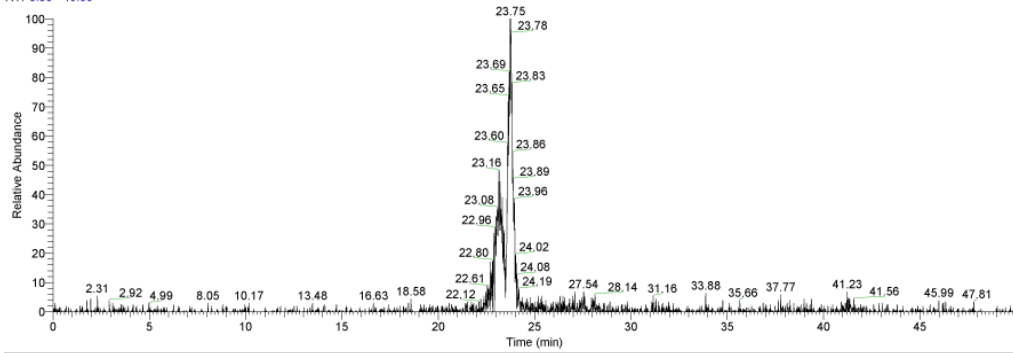

NL:  
2.05E2  
m/z=  
764.51-  
765.51 MS  
MS-DATA

MS-DATA #1875 RT: 23.75 AV: 1 NL: 7.40E2  
T: ITMS - c ESI Full ms [100.00-1000.00]

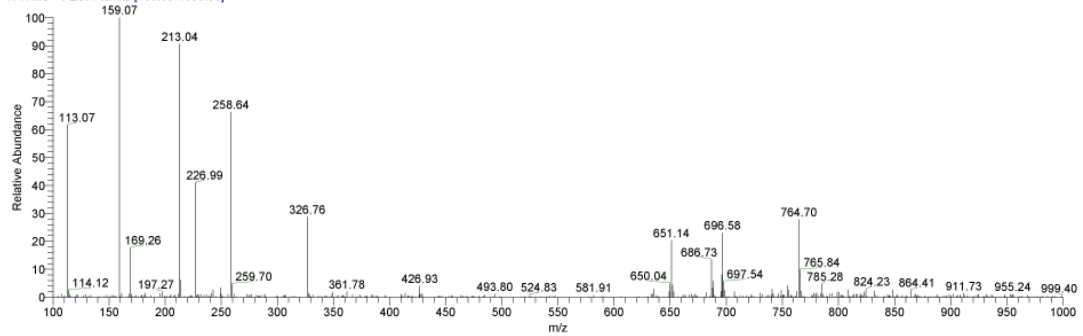

4

RT: 0.00 - 49.99

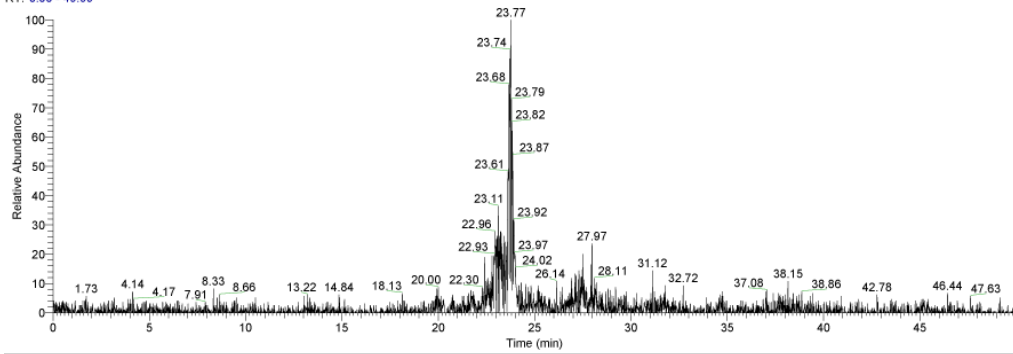

NL:  
1.95E2  
m/z=  
650.15-  
651.15 MS  
MS-DATA

MS-DATA #1876 RT: 23.77 AV: 1 NL: 4.11E2  
T: ITMS - c ESI Full ms [100.00-1000.00]

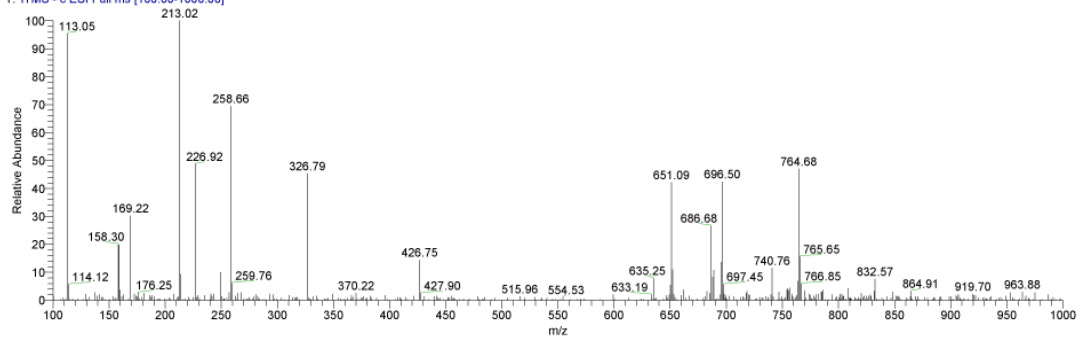

5

RT: 0.00 - 49.99

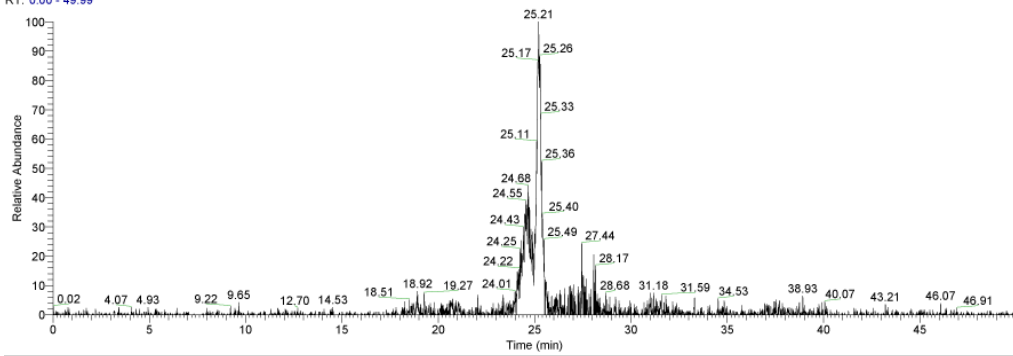

NL:  
3.11E2  
m/z=  
633.70-  
634.70 MS  
MS-DATA

MS-DATA #1990 RT: 25.21 AV: 1 NL: 1.09E3  
T: ITMS - c ESI Full ms [100.00-1000.00]

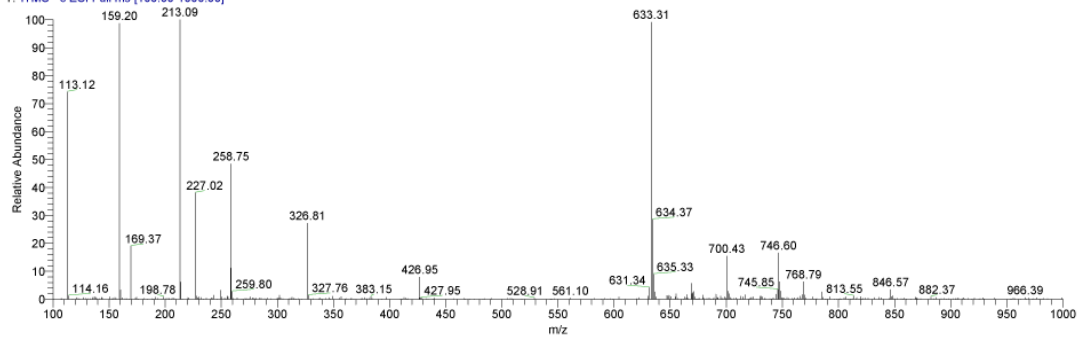

6

RT: 0.00 - 49.99

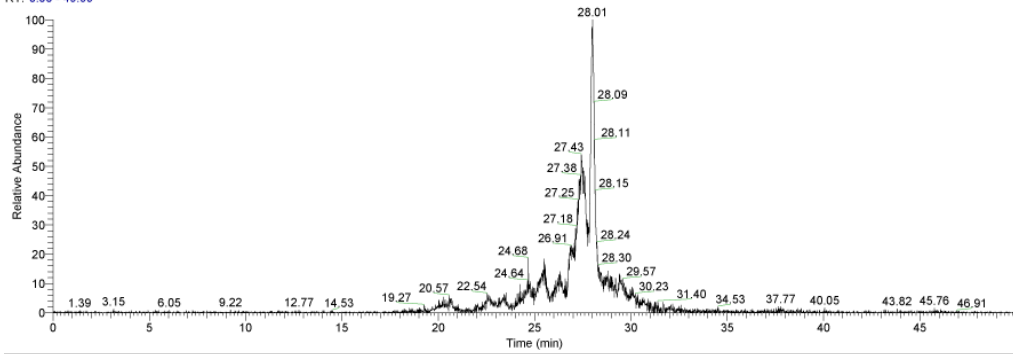

NL:  
1.03E3  
m/z=  
634.49-  
635.49 MS  
MS-DATA

MS-DATA #2211 RT: 28.01 AV: 1 NL: 1.03E3  
T: ITMS - c ESI Full ms [100.00-1000.00]

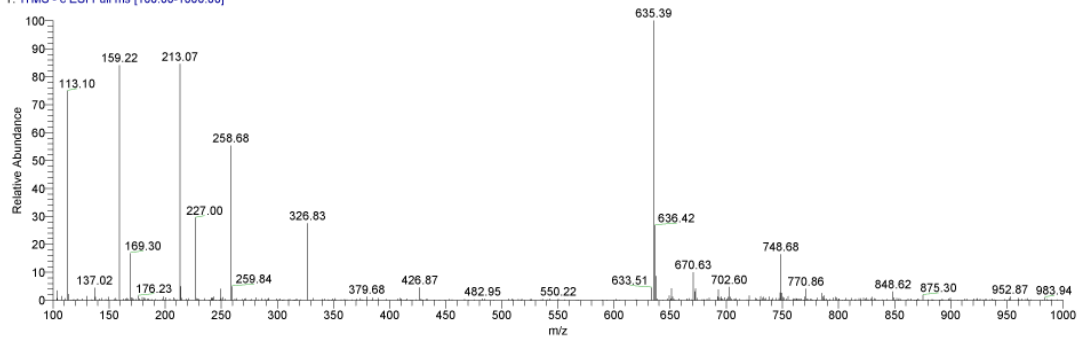

7

RT: 0.00 - 49.99

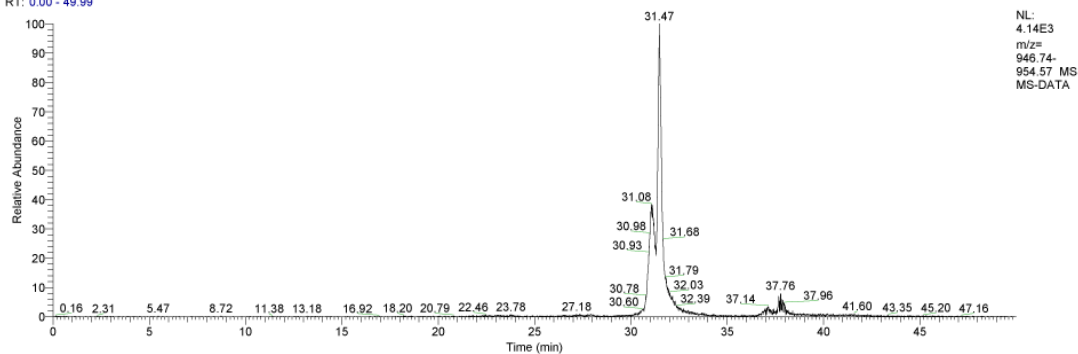

NL:  
4.14E3  
m/z=  
946.74-  
954.57 MS  
MS-DATA

MS-DATA #2484 RT: 31.47 AV: 1 NL: 2.21E3  
T: ITMS - c ESI Full ms [100.00-1000.00]

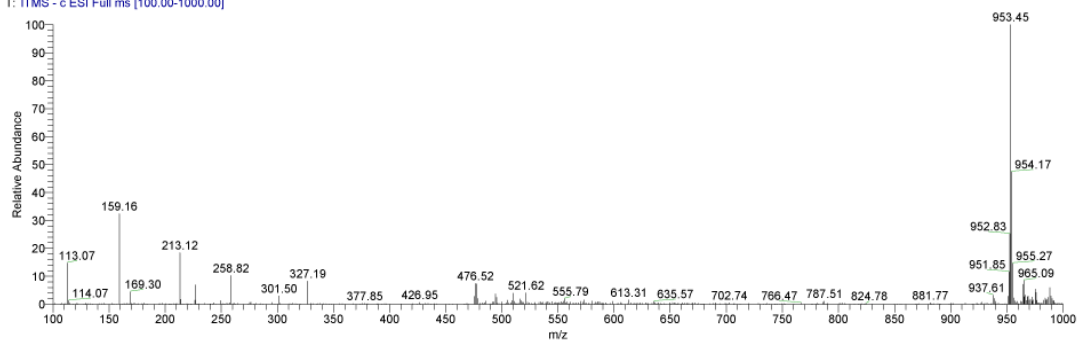

8

RT: 0.00 - 49.99

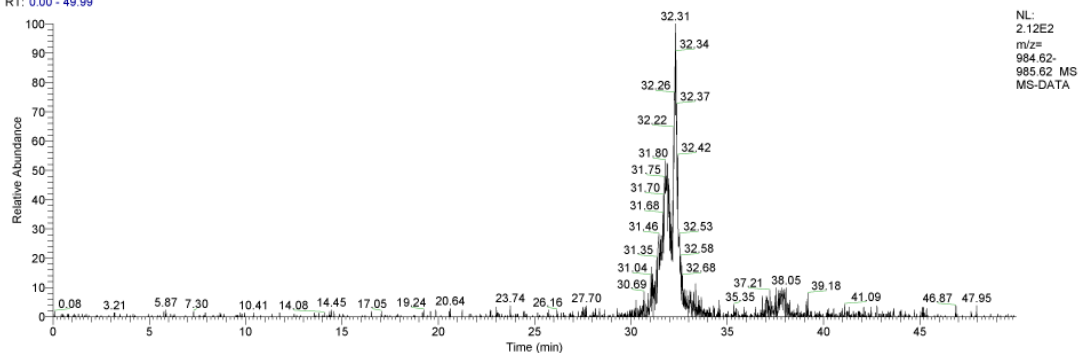

NL:  
2.12E2  
m/z=  
984.62-  
985.62 MS  
MS-DATA

MS-DATA #2550 RT: 32.31 AV: 1 NL: 9.54E2  
T: ITMS - c ESI Full ms [100.00-1000.00]

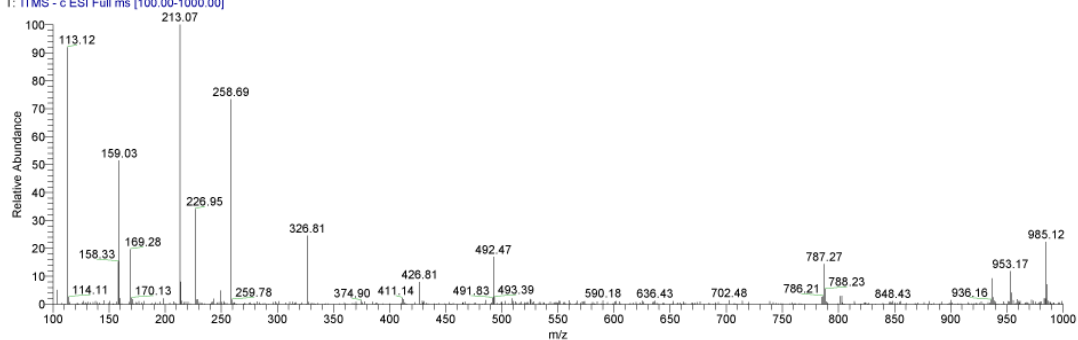

9

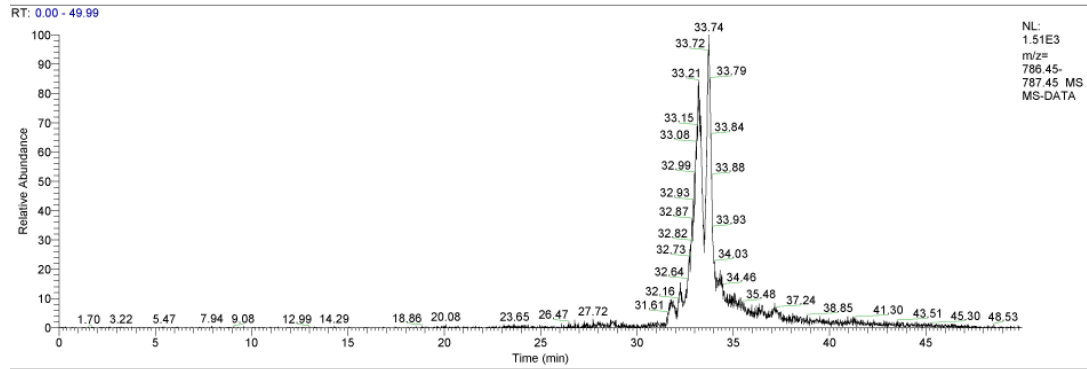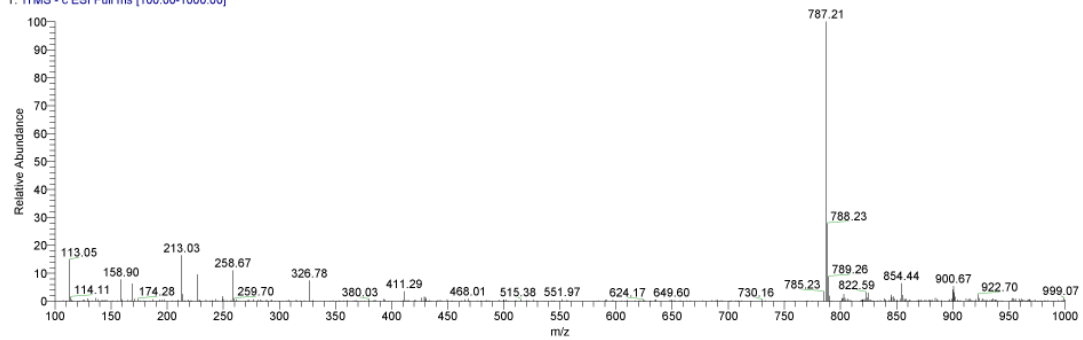

10

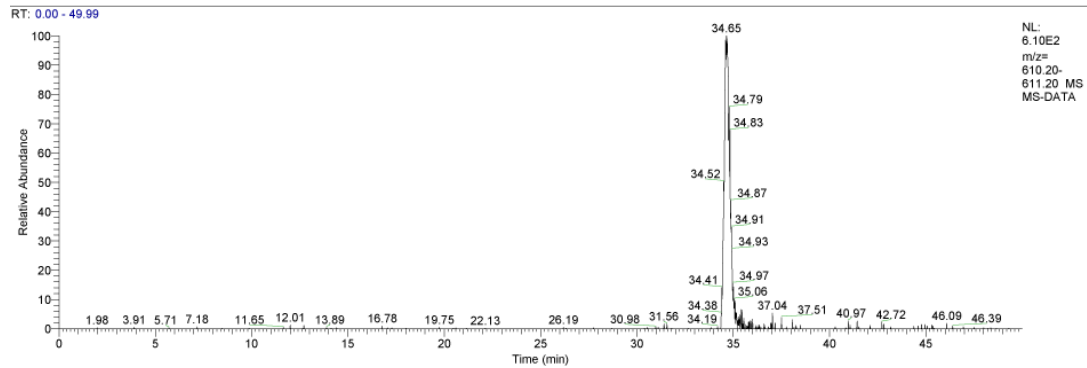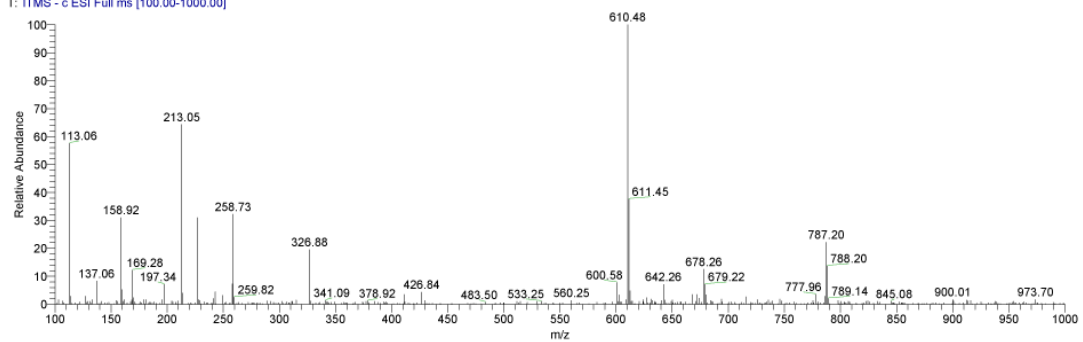

11

RT: 0.00 - 49.99

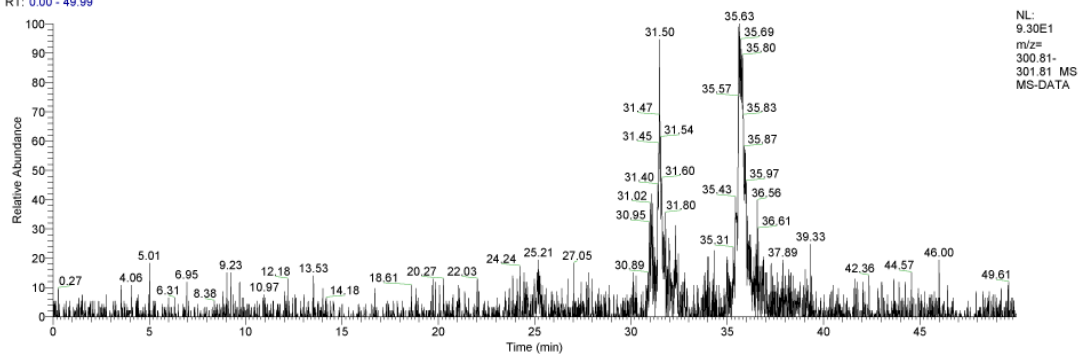

MS-DATA #2812 RT: 35.63 AV: 1 NL: 8.90E2

T: ITMS - c ESI Full ms [100.00-1000.00]

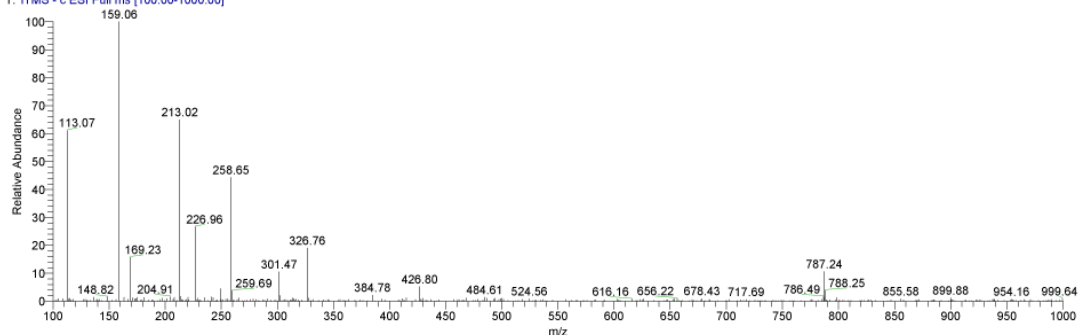

12

RT: 0.00 - 49.99

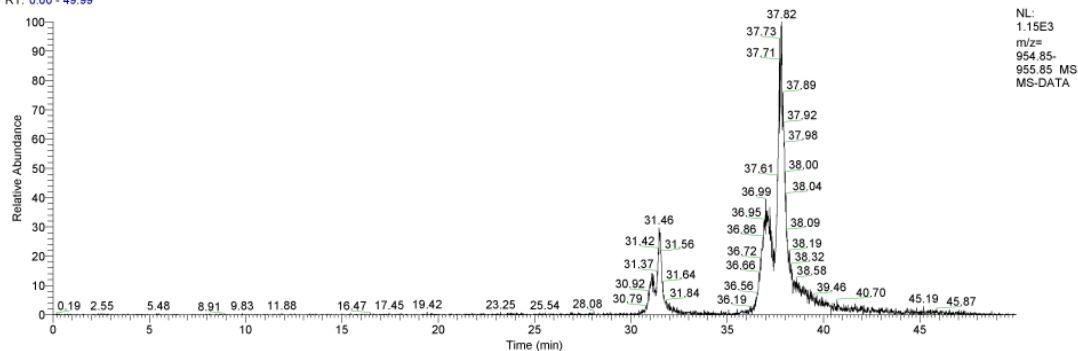

MS-DATA #2985 RT: 37.82 AV: 1 NL: 1.15E3

T: ITMS - c ESI Full ms [100.00-1000.00]

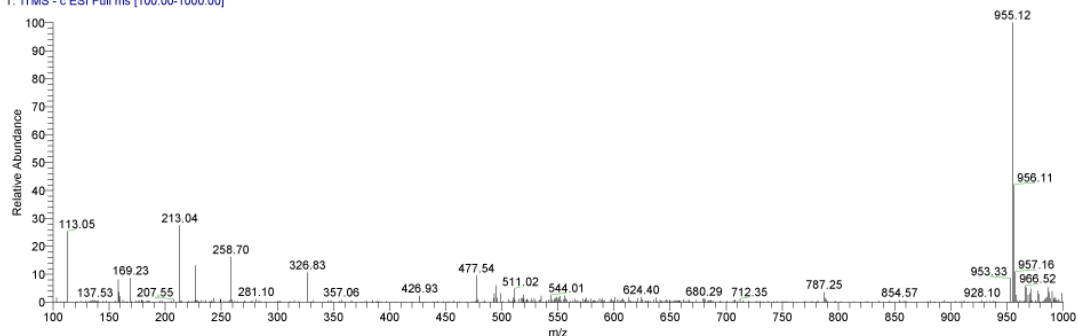



13

RT: 0.00 - 49.99

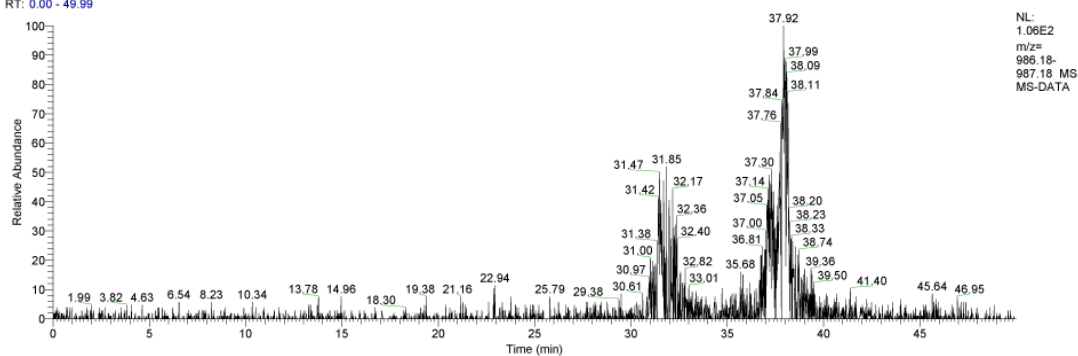MS-DATA #2993 RT: 37.92 AV: 1 NL: 7.56E2  
T: ITMS - c ESI Full ms [100.00-1000.00]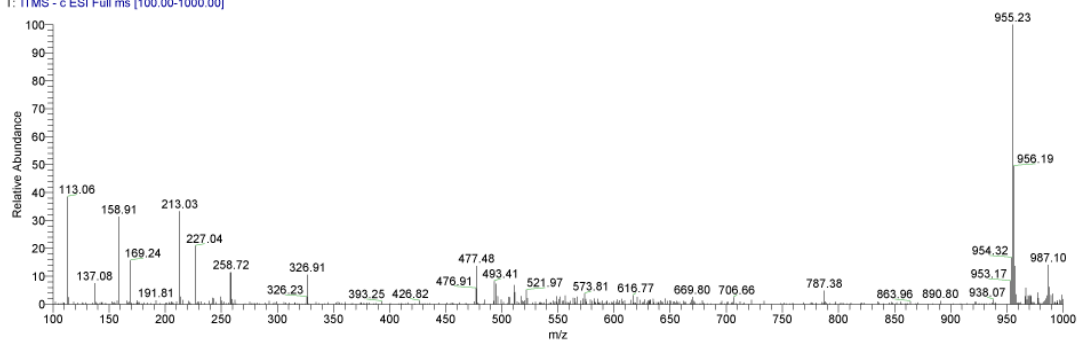

14

RT: 0.00 - 49.99

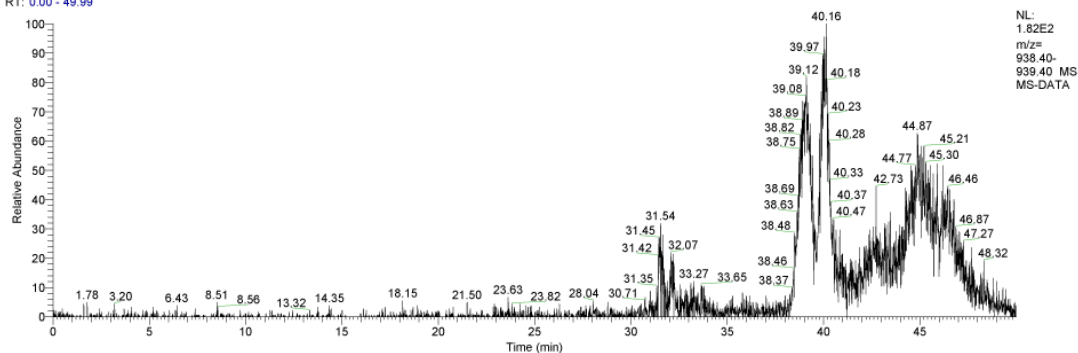MS-DATA #3169 RT: 40.16 AV: 1 NL: 7.80E2  
T: ITMS - c ESI Full ms [100.00-1000.00]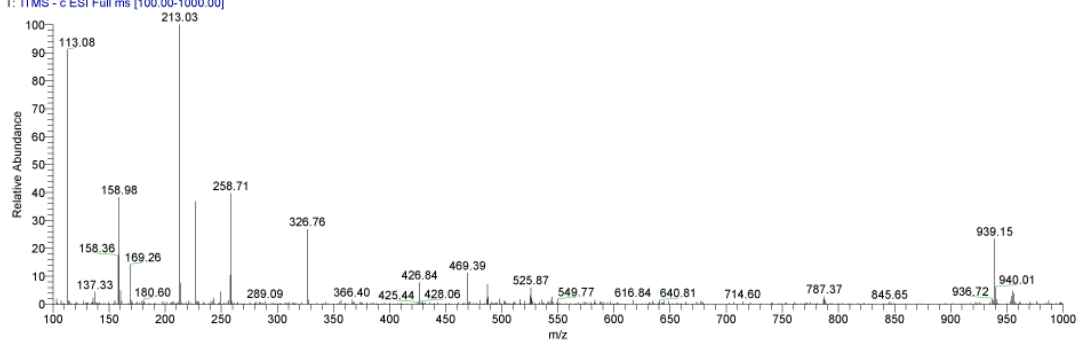

15

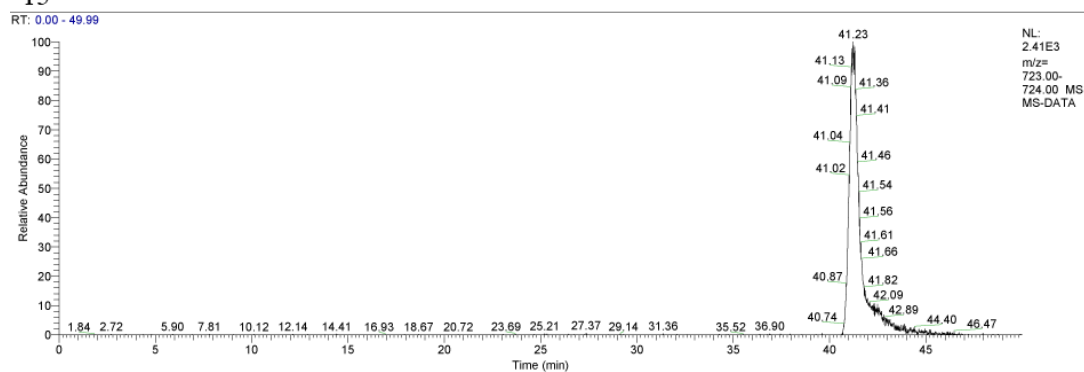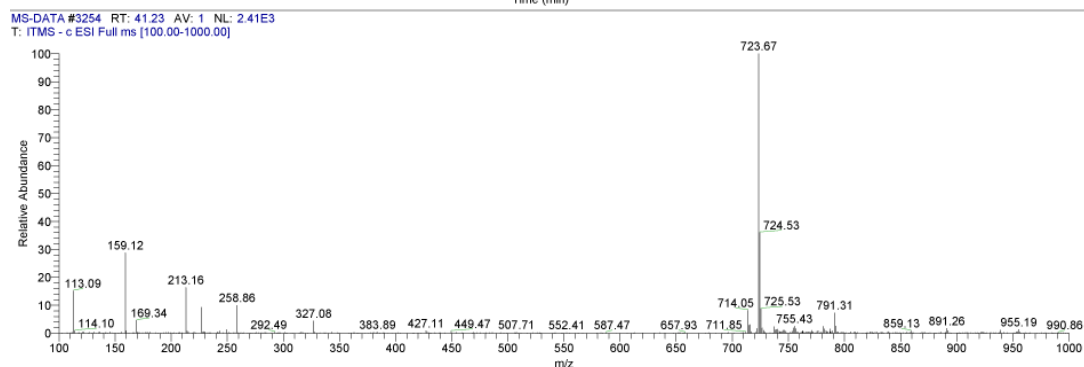

16

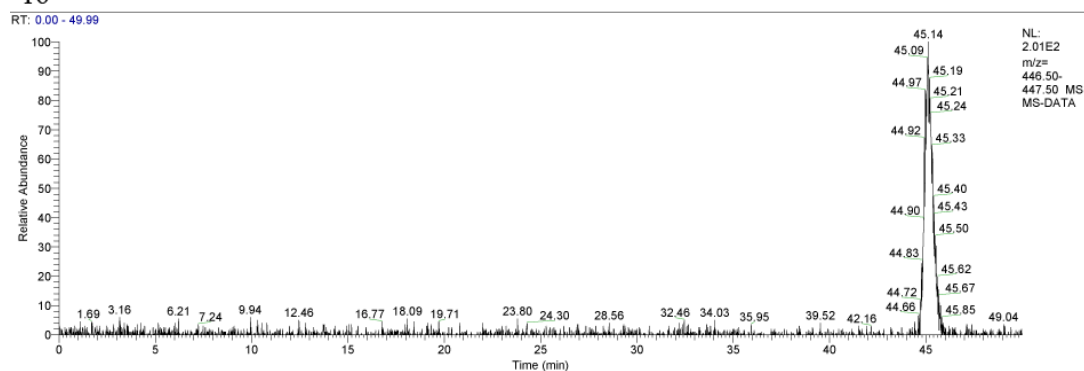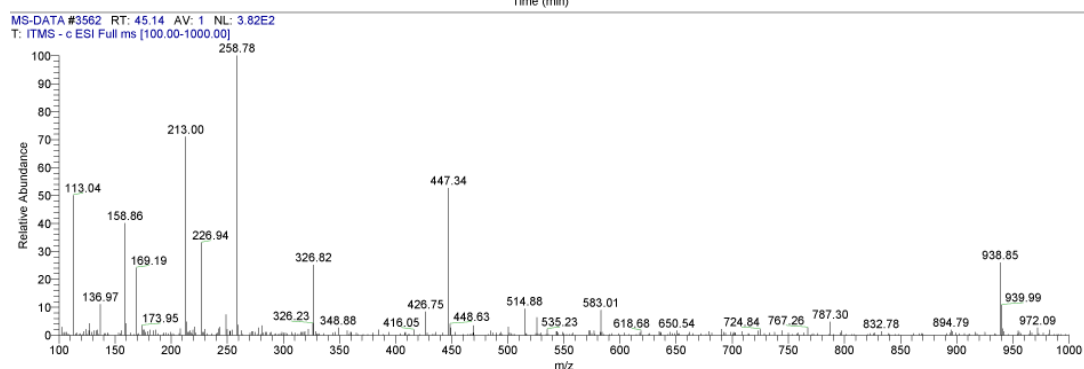

**Supplemental Figure 2.** MS spectra of the putative 16 compounds in EF. The number of each spectrum corresponds to the peak number in Table 2, Figure 1, Supplemental Figure 1 and Supplemental Figure 3.

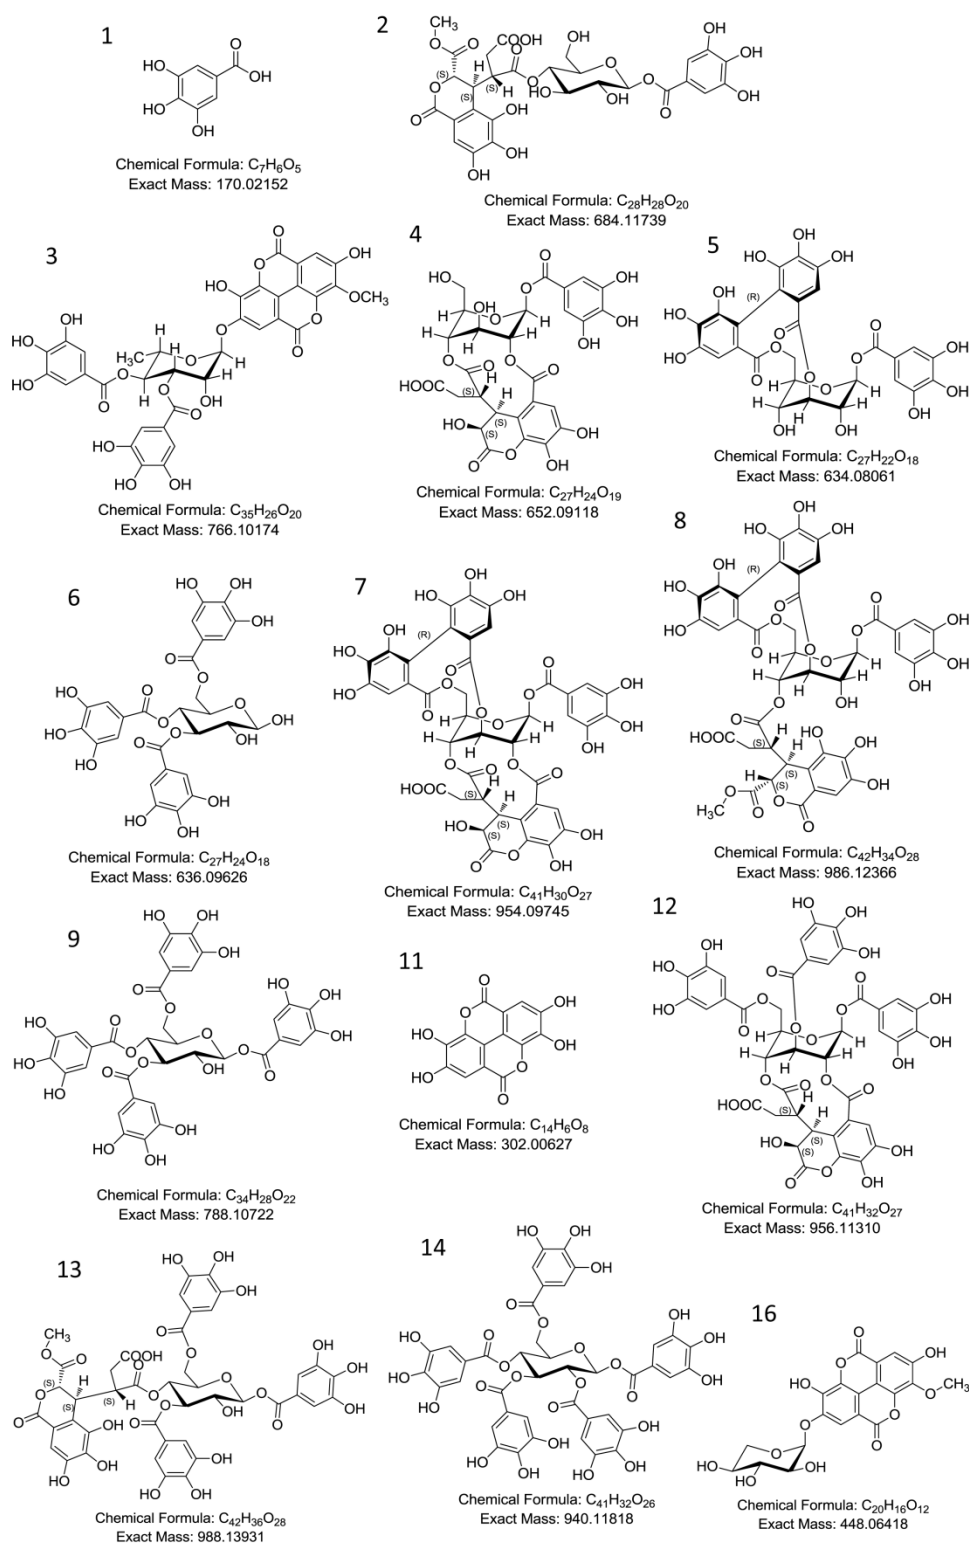

**Supplemental Figure 3.** Structures of the 14 phenolic compounds identified from EF based on the HPLC-MS data and the known structures of reference compounds. Compound numbers, chemical formula and exact mass are presented.

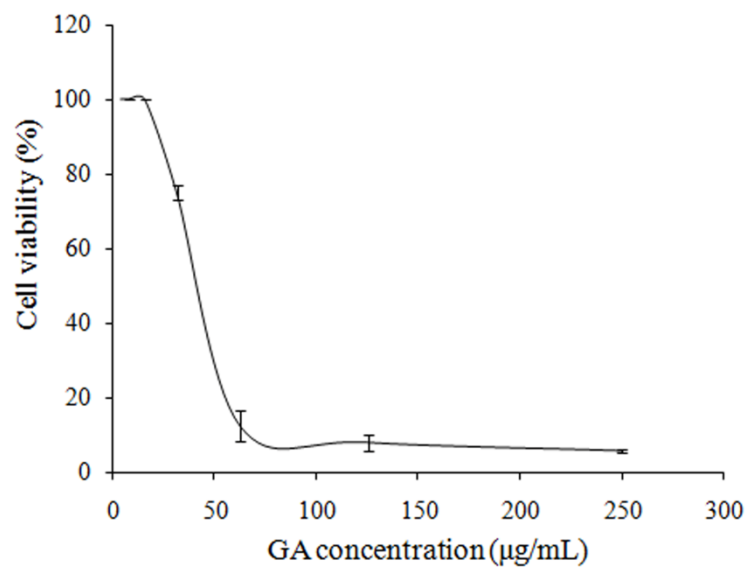

**Supplemental Figure 4.** Effect of GA on HSC-T6 cell viability. The viability rate (%) of HSC-T6 cells manifest decreased with increased GA concentration.
